# Supplementary material
Source: PubMed Central journal article supplement (PMC5039682)
Supplement: thnov06p2084s1.pdf [file thnov06p2084s1.pdf]

## Supporting information

### Optimizing Early Response Monitoring and Prediction of Cancer Antiangiogenesis Therapy by Noninvasive PET Molecular Imaging Strategies of Multifactorial Bioparameters

Xiao Bao, Ming-Wei Wang<sup>\*</sup>, Jian-Min Luo, Si-Yang Wang, Yong-Ping Zhang,  
Ying-Jian Zhang

Department of Nuclear Medicine, Fudan University Shanghai Cancer Center;  
Department of Oncology, Shanghai Medical College, Fudan University; Center for  
Biomedical Imaging, Fudan University; Shanghai Engineering Research Center for  
Molecular Imaging Probes, Shanghai 200032, China

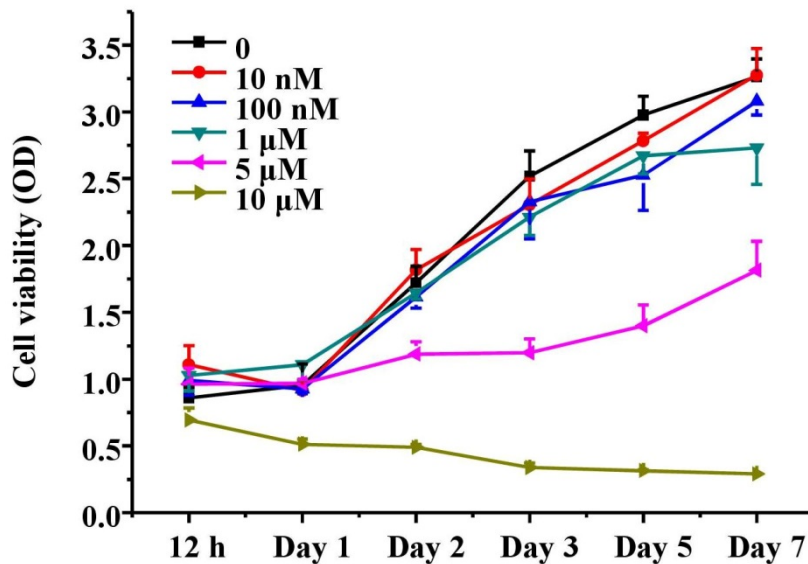

Figure S1: Antitumor effects of sunitinib on U87MG cells

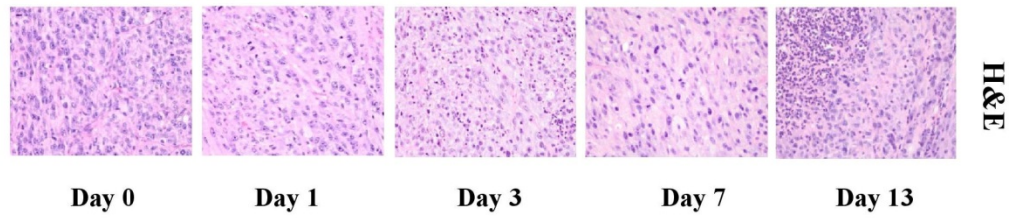

**Figure S2: H&E staining of tumor sections on days 0, 1, 3, 7 and 13 post treatment**

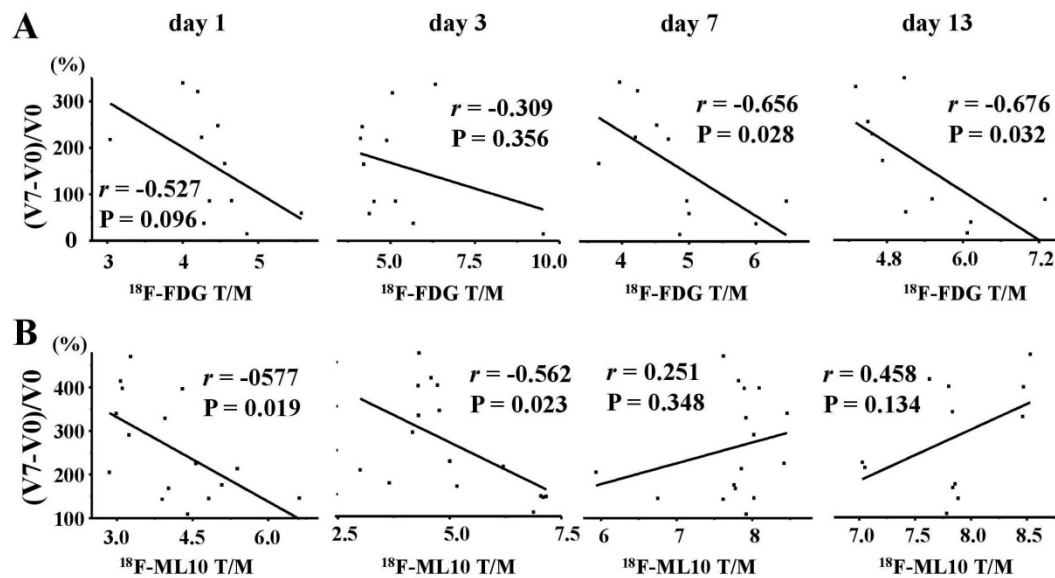

**Figure S3: Correlations between tumor growth ratios (TGR) and T/M of  $^{18}\text{F-FDG}$  (A) and  $^{18}\text{F-ML-10}$  (B) on days 1, 3, 7 and 14 (from Left to Right). It was showed that the T/M of both  $^{18}\text{F-FDG}$  and  $^{18}\text{F-ML-10}$  at the time points post treatment were not correlated with the therapeutic effect  $((V_7 - V_0)/V_0)$ .**
